# Supplementary material
Source: PubMed Central journal article supplement (PMC8498651)
Supplement: mmc1.pdf [file mmc1.pdf]

**Cell Reports, Volume 37**

**Supplemental information**

**Structural mechanism of SARS-CoV-2 neutralization**

**by two murine antibodies targeting the RBD**

**John M. Errico, Haiyan Zhao, Rita E. Chen, Zhuoming Liu, James Brett Case, Meisheng Ma, Aaron J. Schmitz, Michael J. Rau, James A.J. Fitzpatrick, Pei-Yong Shi, Michael S. Diamond, Sean P.J. Whelan, Ali H. Ellebedy, and Daved H. Fremont**

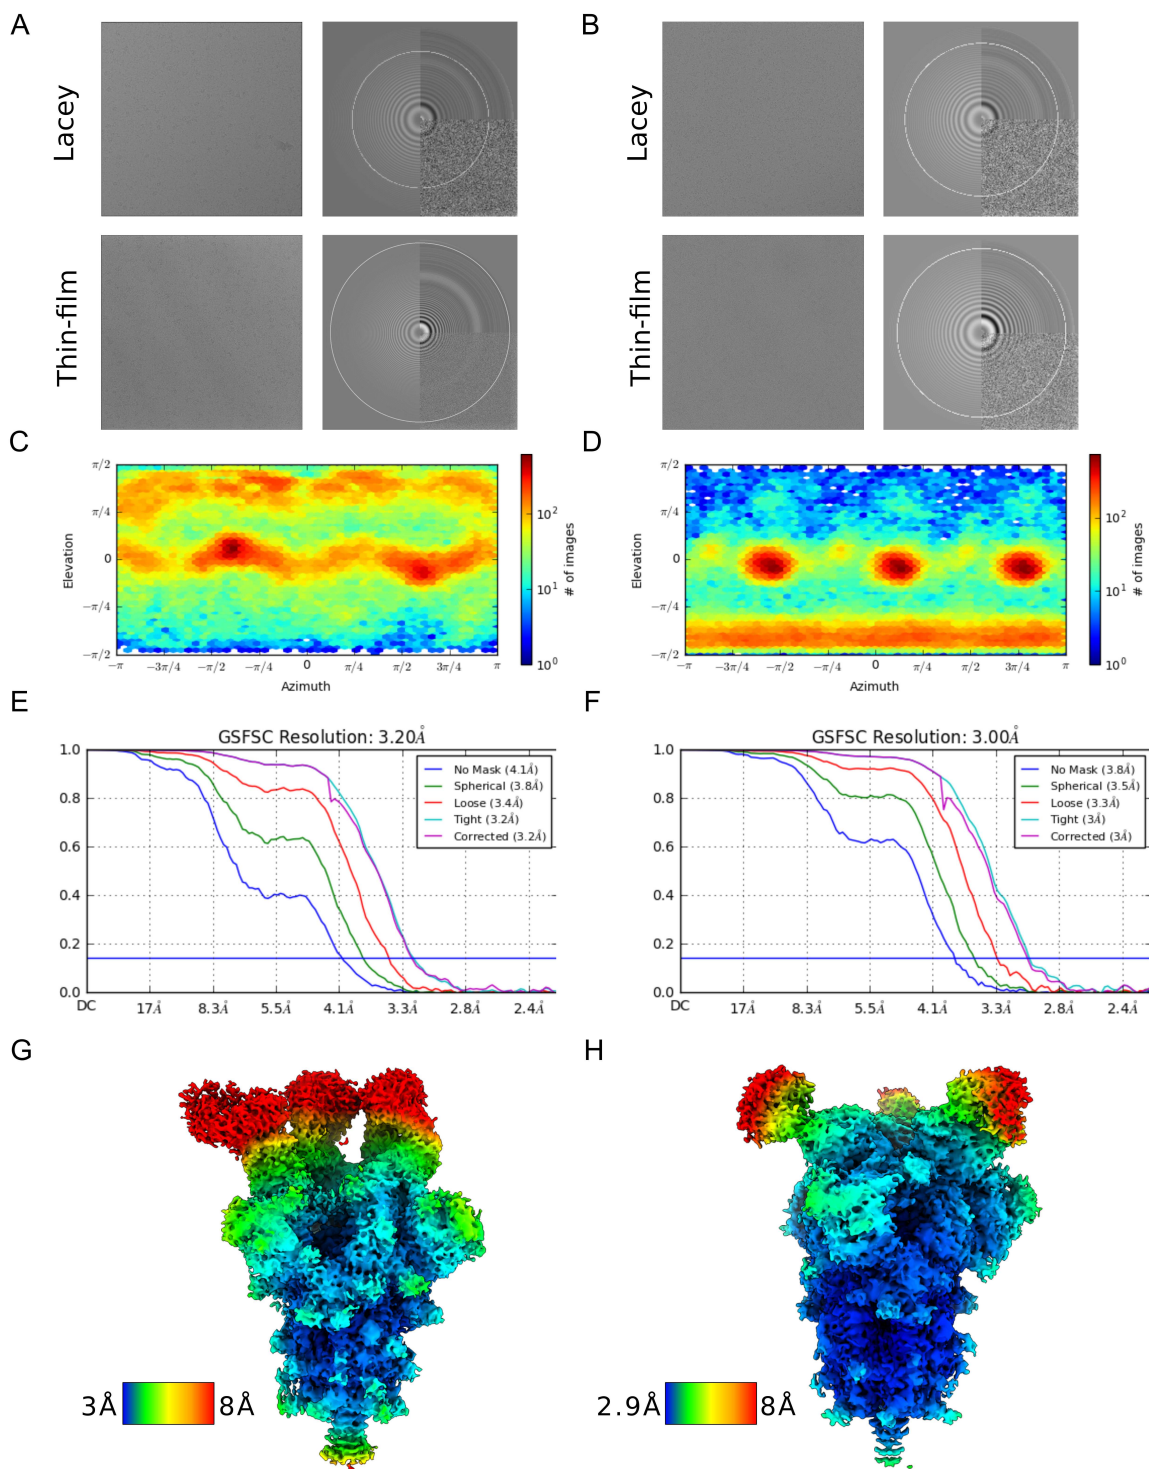

**Figure S1: Cryo-EM validation for 2B04 and 2H04 maps. Related to figure 1.** (A) Example micrographs and CTF estimates for 2B04-spike datasets imaged on holey lacey carbon grids or lacey carbon grids with ultra-thin carbon film. (B) Example micrographs and CTF estimates for 2H04-spike datasets imaged with holey lacey carbon grids or lacey carbon grids with ultra-thin carbon film. (C) Particle orientation distribution for 2B04-spike up/down/down reconstruction. (D) Particle orientation distribution for 2H04-spike down/down/down reconstruction. (E) GSFSC curve for 2B04-spike up/down/down refinement. (F) GSFSC curve for 2H04-spike down/down/down refinement. (G) Local resolution map for 2B04-spike up/down/down map. (H) Local resolution map for 2H04-spike down/down/down map.

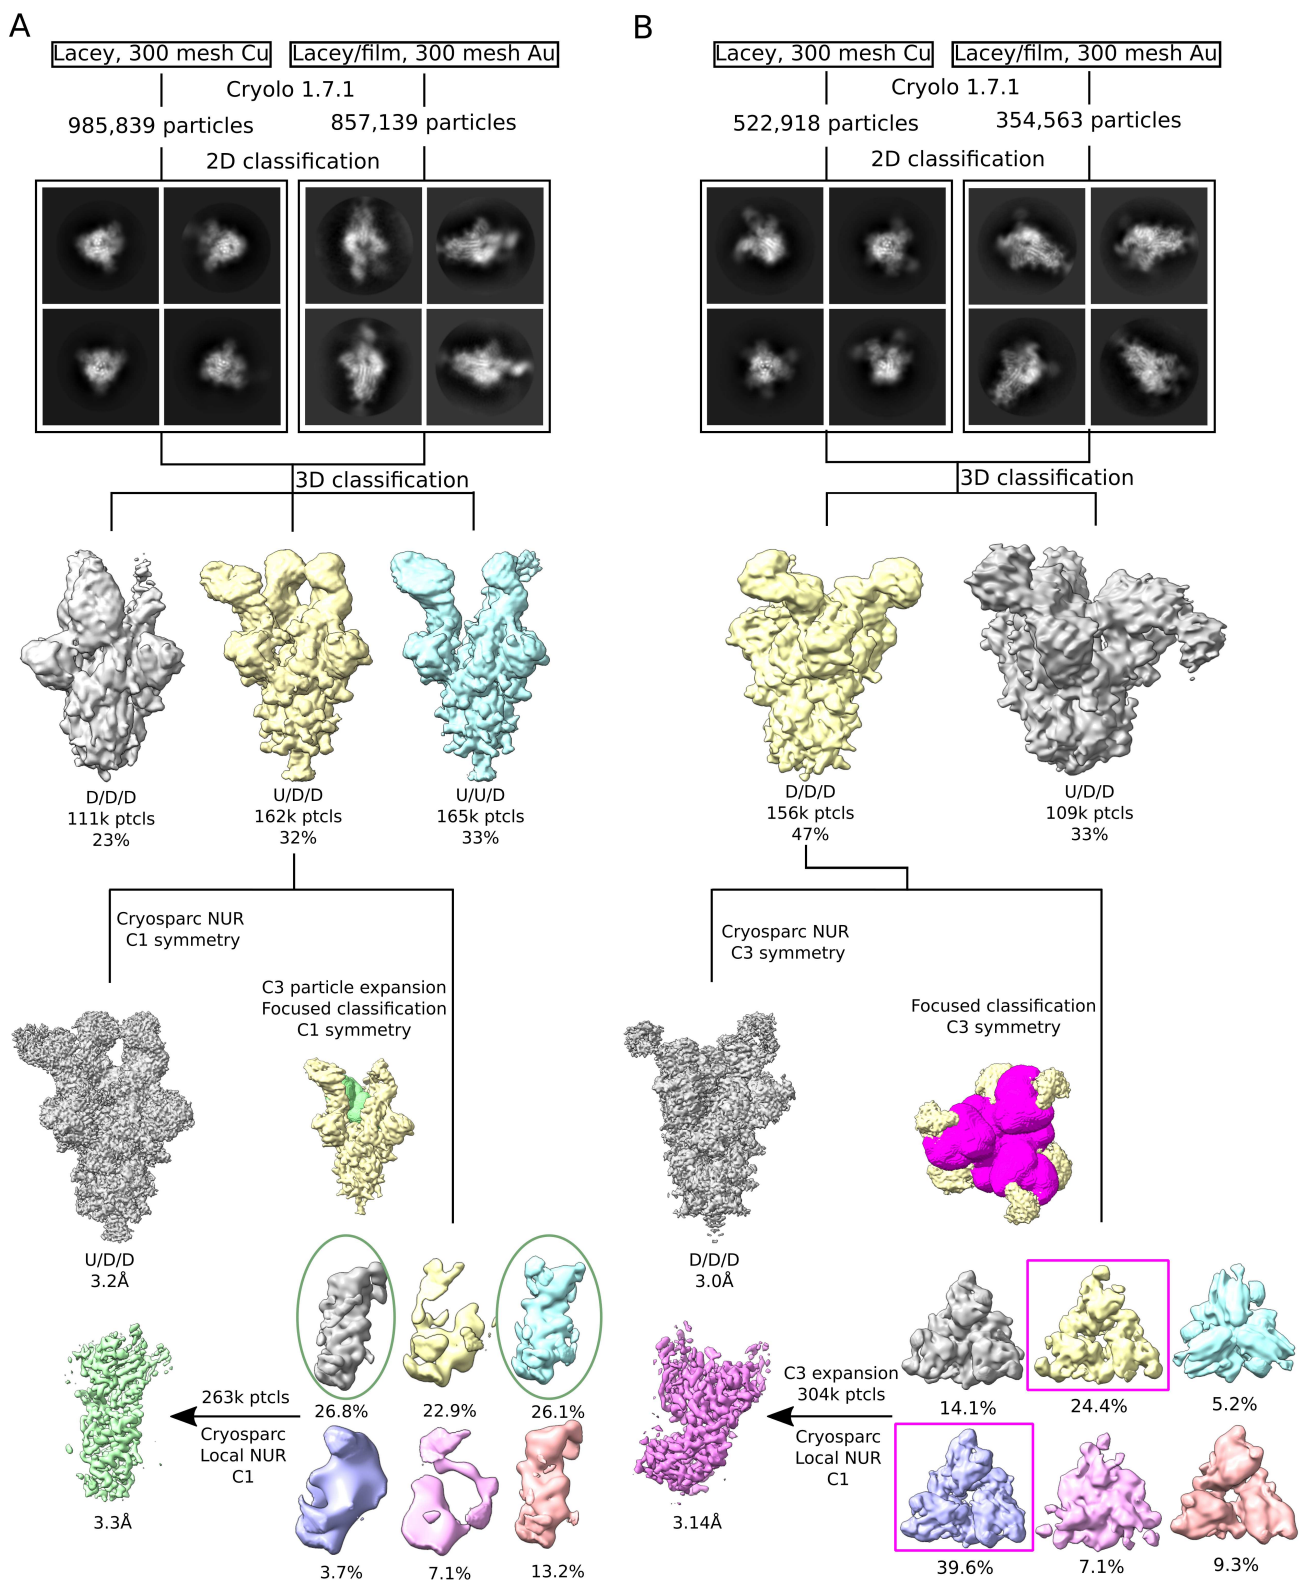

**Figure S2: Cryo-EM processing strategy. Related to figures 1 and 2. (A)** Flowchart depicting cryo-EM data processing steps for the 2B04-spike up/down/down and 2B04/RBD locally refined maps. **(B)** Flowchart depicting cryo-EM data processing steps for the 2H04-spike down/down/down and 2H04/RBD locally refined maps.

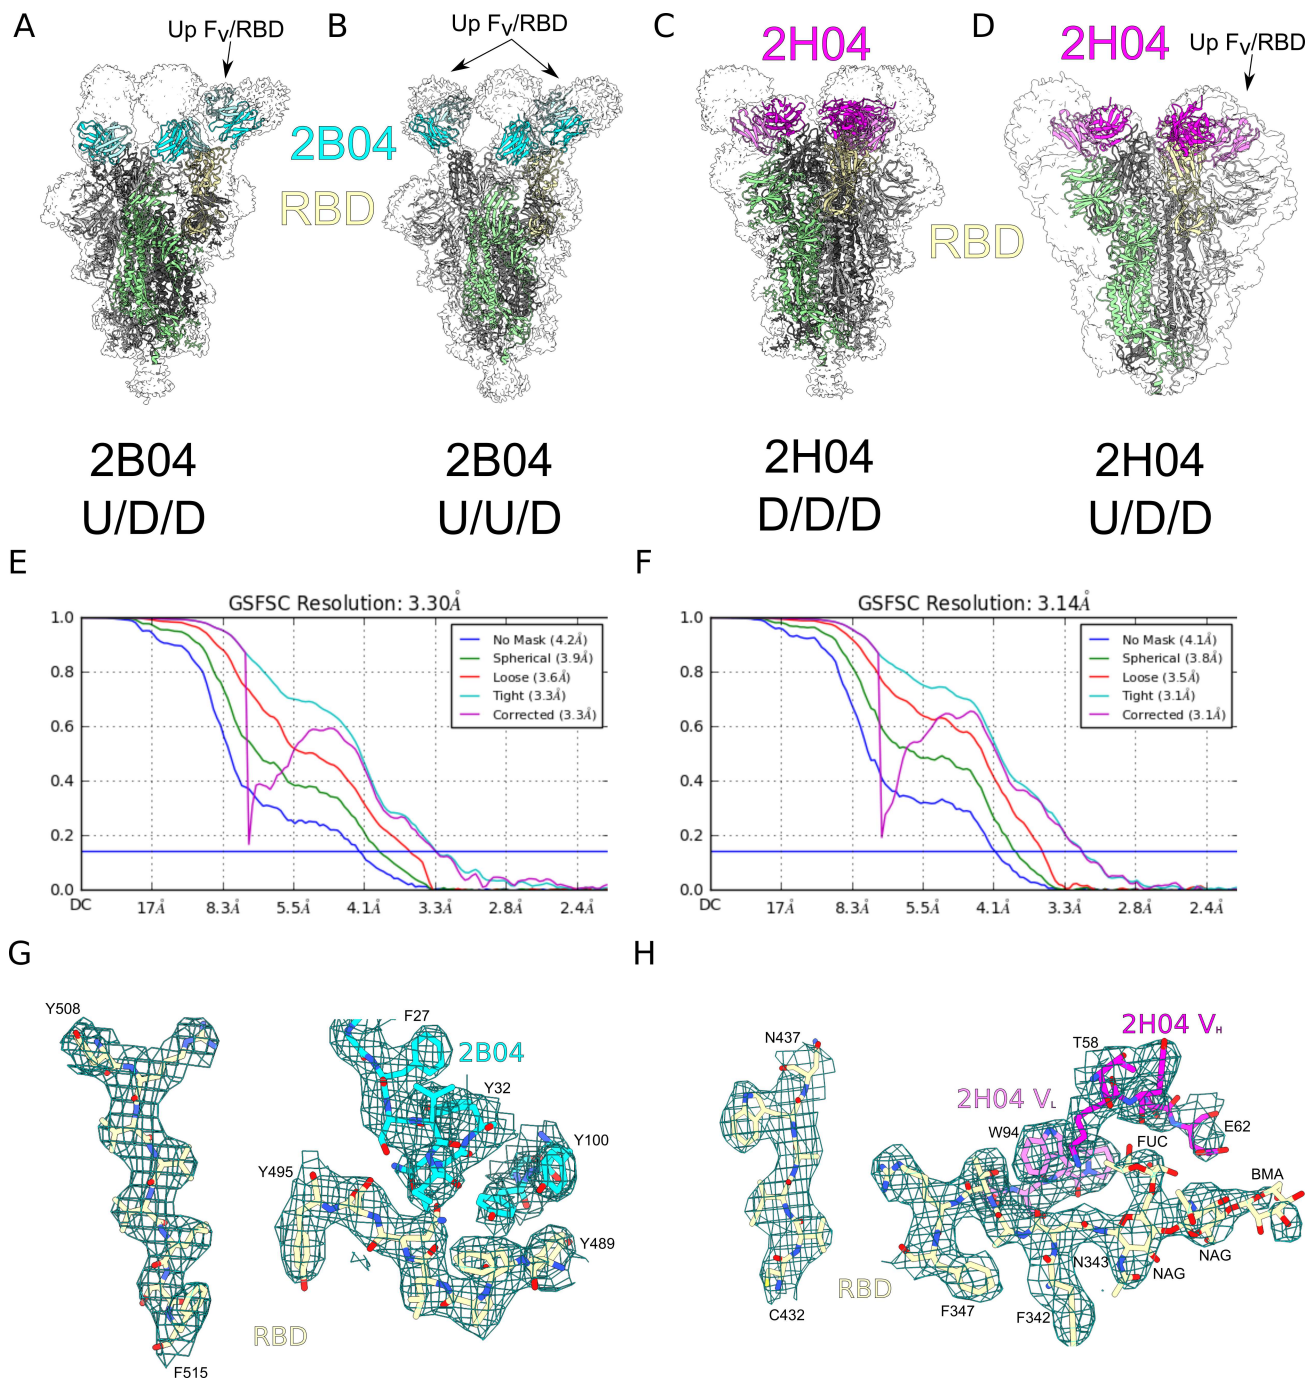

**Figure S3: Model fits into maps and validation for locally refined maps. Related to figures 1 and 2.** (A) Density map for 2B04 U/D/D spike reconstruction shown as an outline, with the model shown internally as a cartoon. S1/S2 is depicted in green, with the RBD portion shown in yellow. 2B04 is shown in cyan. (B) Density map for 2B04 U/U/D spike reconstruction shown as an outline, with the model shown internally as a cartoon and colored as in A. (C) Density map for 2H04 D/D/D spike reconstruction shown as an outline, with the model shown internally as a cartoon. S1/S2 is depicted in green, with the RBD portion shown in yellow. 2H04 is shown in magenta. (D) Density map for 2H04 U/D/D spike reconstruction shown as an outline, with the model shown internally as a cartoon and colored as in C. (E) GSFSC curve for the locally refined 2B04/RBD map. (F) GSFSC curve for the locally refined 2H04/RBD map. (G) Example density and model fits for an RBD beta-strand (left) and at the 2B04/RBD interface (right). RBD is colored in yellow, 2B04 heavy chain is colored in cyan. (H) Example density and model fits for an RBD beta-strand (left) and at the 2H04/RBD interface (right). RBD is shown in yellow. 2H04 heavy chain is shown in magenta, while the light chain is shown in violet.



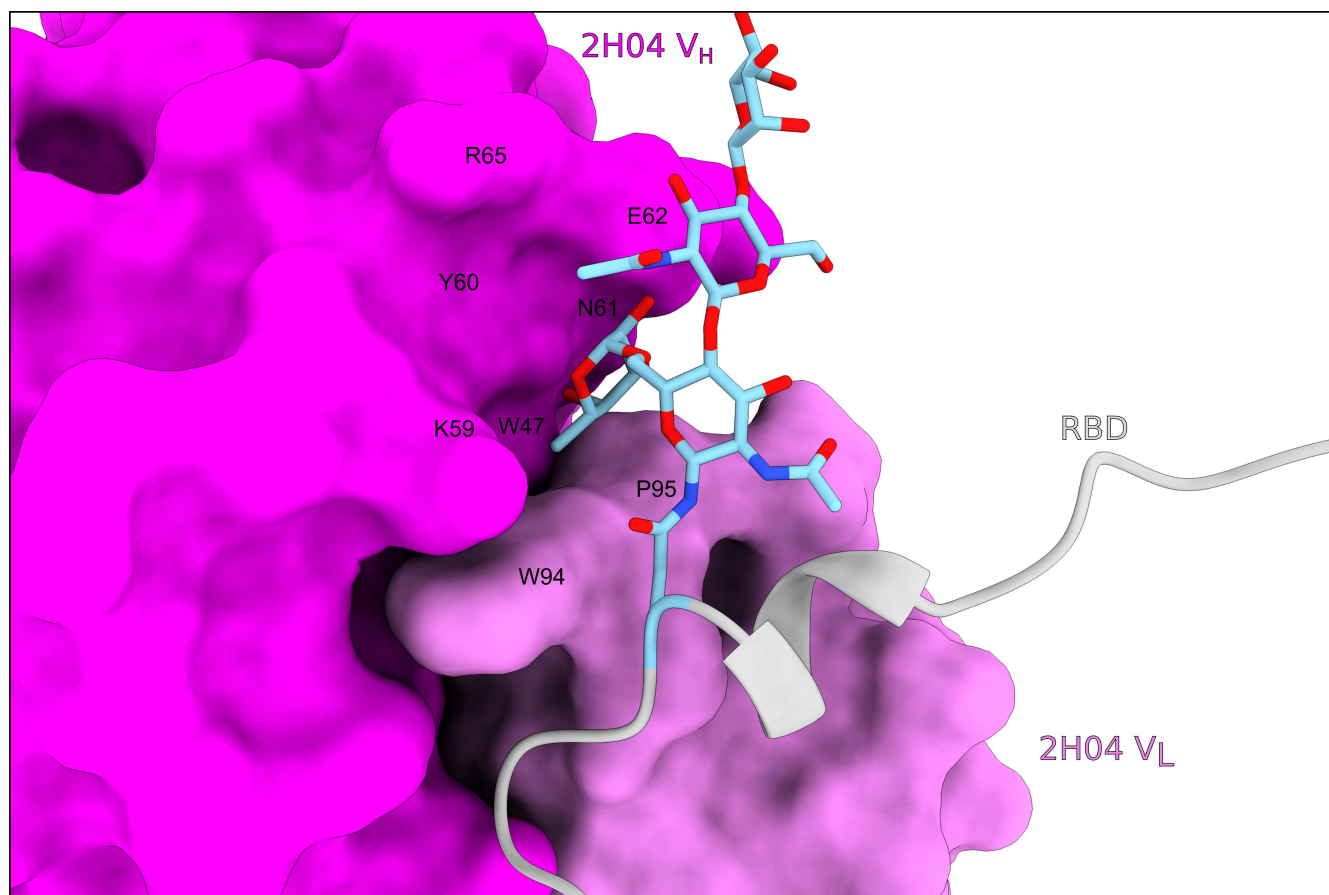

**Figure S4: 2H04 contacts the core fucose of the N343 glycan on SARS-CoV-2 RBD. Related to figure 2.** 2H04 is depicted as a surface, with the heavy chain colored magenta and the light chain colored violet. The N343 glycan is depicted as atoms in blue, with the remainder of the N-terminal strand of the RBD depicted in silver as a cartoon ribbon. Residues at the interface between the core fucose and 2H04 are labelled in black text.

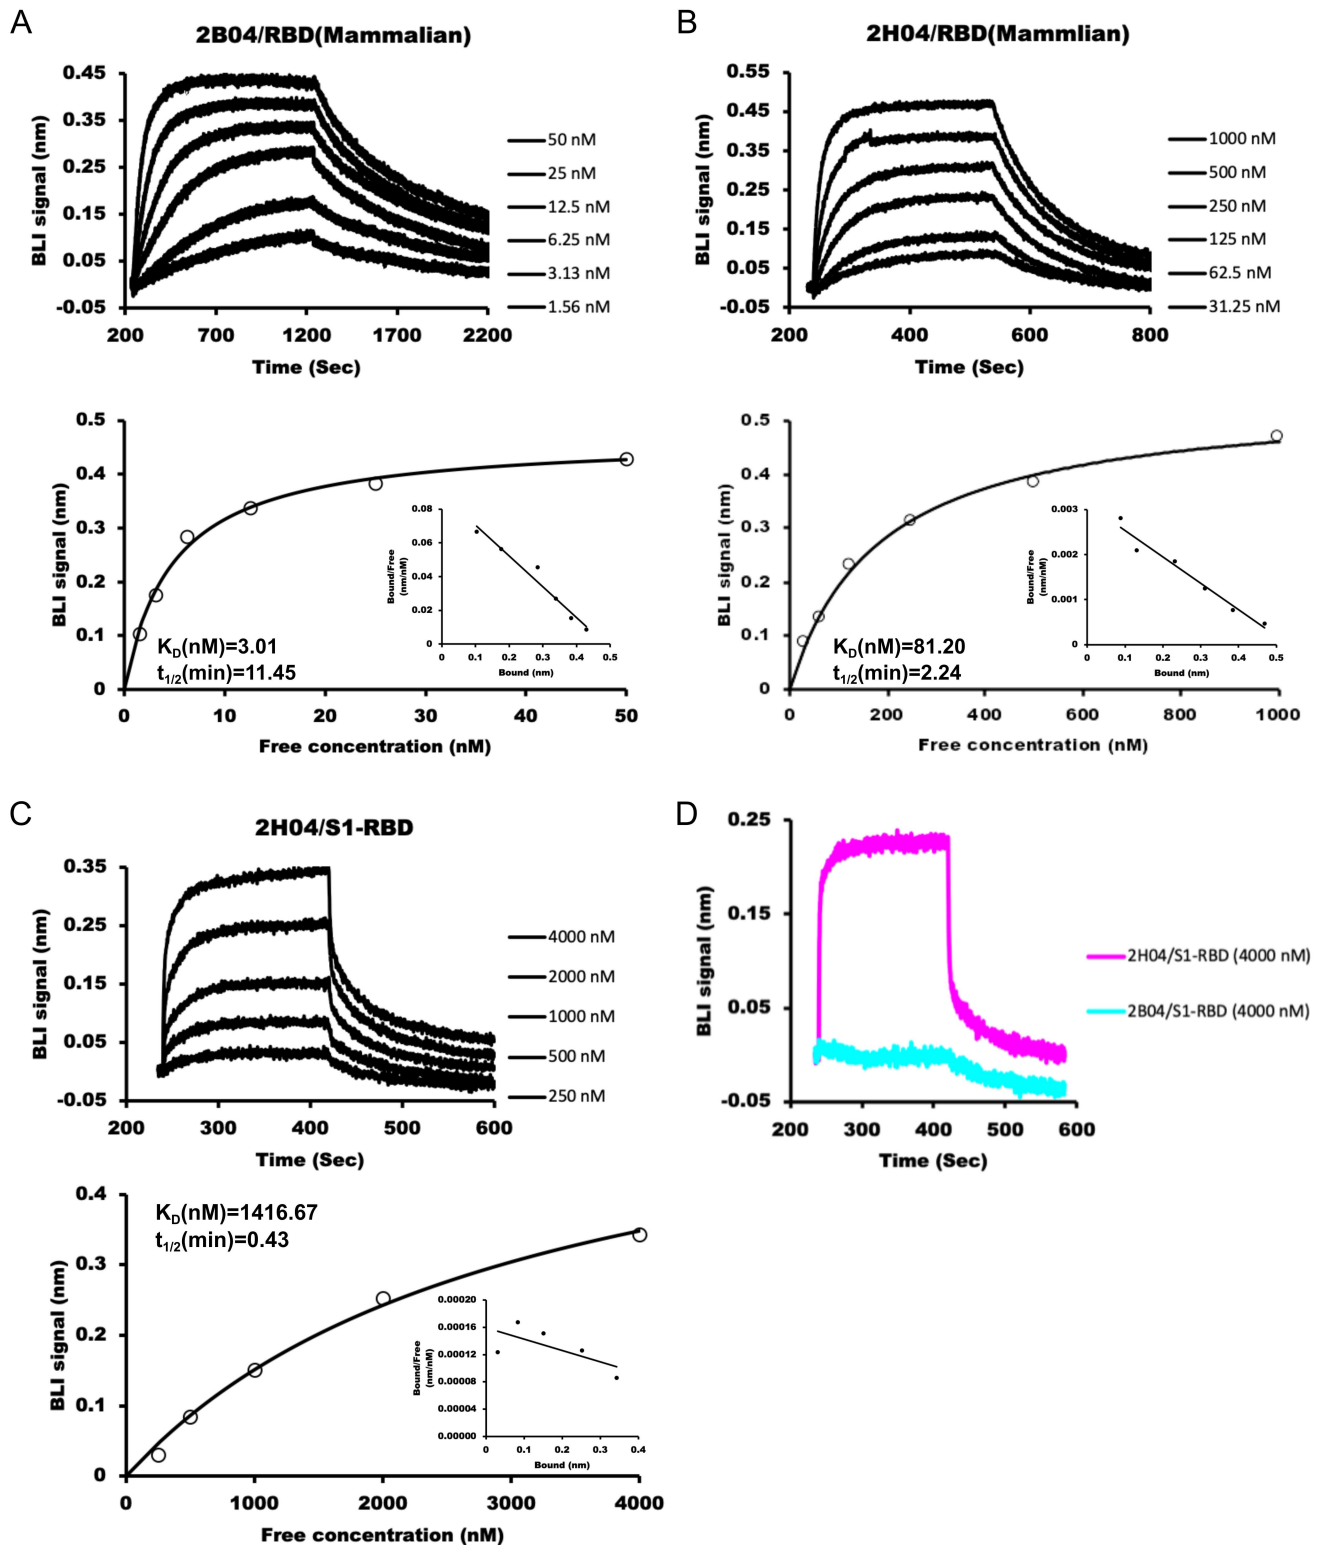

**Figure S5: Binding affinity of 2B04 and 2H04 to mammalian cell-derived SARS-CoV-2 RBD. Related to figure 6. (A)** Binding of 2B04 to mammalian cell-derived SARS-CoV-2 RBD. **(B)** Binding of 2H04 to mammalian cell-derived SARS-CoV-2 RBD. **(C)** Binding of 2H04 to bacterially derived SARS-CoV RBD. **(D)** Binding of 2B04 to bacterially derived SARS-CoV RBD. Kinetic values were fitted to a 1:1 Langmuir binding model ( $K_D$ , kinetic). Steady-state analysis is shown below kinetic plots ( $K_D$ , equilibrium) with inset Scatchard plots. Data were analyzed using Biaevaluation 3.1 (GE Healthcare). One representative trace of two or three independent experiments is shown.

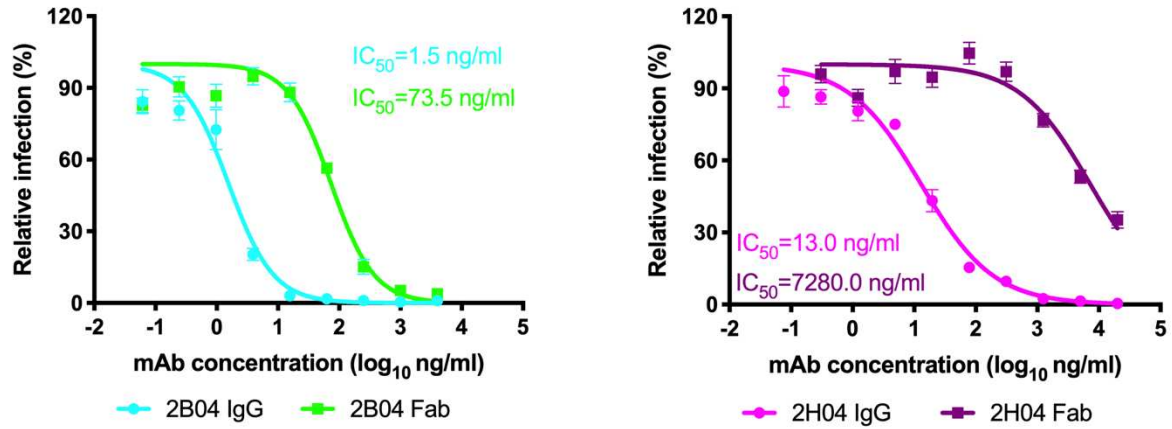

**Figure S6: Neutralization profiles of 2B04 and 2H04 IgG versus Fab. Related to figure 6.** Serial dilutions of 2B04 or 2H04 mAbs or Fabs were pre-mixed with GFP expressing VSV-SARS-CoV-2 for 1 hour, followed by addition of the mixture to Vero E6-TMPRSS2 cells. GFP<sup>+</sup> infected cells were quantified by flow cytometry 8 hours post of infection. Data are pooled from three independent experiments performed in duplicate. Error bars indicate SEM.





**Table S1: Cryo-EM data collection, processing, refinement, and validation statistics. Related to Figures 1 and 2.**

|                                                     | SARS-CoV-2 spike U/D/D with Fab 2B04 (full)<br>PDB 7K9H<br>EMD-22748 | SARS-CoV-2 spike U/D/D with Fab 2B04 (local)<br>PDB 7K9I<br>EMD-22749 | SARS-CoV-2 spike U/U/D with Fab 2B04 (full)<br>EMD-22752 | SARS-CoV-2 spike D/D/D with Fab 2H04 (full)<br>PDB 7K9J<br>EMD-22750 | SARS-CoV-2 spike D/D/D with Fab 2H04 (local)<br>PDB 7K9K<br>EMD-22751 | SARS-CoV-2 spike U/D/D with Fab 2H04 (full)<br>EMD-22753 |
|-----------------------------------------------------|----------------------------------------------------------------------|-----------------------------------------------------------------------|----------------------------------------------------------|----------------------------------------------------------------------|-----------------------------------------------------------------------|----------------------------------------------------------|
| <b>Data collection</b>                              |                                                                      |                                                                       |                                                          |                                                                      |                                                                       |                                                          |
| Magnification                                       | 105,000x                                                             | 105,000x                                                              | 105,000x                                                 | 105,000x                                                             | 105,000x                                                              | 105,000x                                                 |
| Voltage (kV)                                        | 300                                                                  | 300                                                                   | 300                                                      | 300                                                                  | 300                                                                   | 300                                                      |
| Electron exposure (e <sup>-</sup> /Å <sup>2</sup> ) | 67                                                                   | 67                                                                    | 67                                                       | 67                                                                   | 67                                                                    | 67                                                       |
| Defocus range (μm)                                  | 0.5-2.5                                                              | 0.5-2.5                                                               | 0.5-2.5                                                  | 0.5-2.5                                                              | 0.5-2.5                                                               | 0.5-2.5                                                  |
| Pixel size (Å/pixel)                                | 1.1                                                                  | 1.1                                                                   | 1.1                                                      | 1.1                                                                  | 1.1                                                                   | 1.1                                                      |
| <b>Data processing</b>                              |                                                                      |                                                                       |                                                          |                                                                      |                                                                       |                                                          |
| Symmetry imposed                                    | C1                                                                   | C1                                                                    | C1                                                       | C3                                                                   | C1                                                                    | C1                                                       |
| Initial particle images (no.)                       | 1,842,978                                                            | 1,842,978                                                             | 1,842,978                                                | 877,481                                                              | 877,481                                                               | 877,481                                                  |
| Final particle images (no.)                         | 162,281                                                              | 263,342 (C3 exp)                                                      | 165,840                                                  | 155,896                                                              | 304,667 (C3 exp)                                                      | 109,868                                                  |
| Map resolution (Å)                                  | 3.2                                                                  | 3.3                                                                   | 3.35                                                     | 3.0                                                                  | 3.14                                                                  | 3.55                                                     |
| FSC threshold                                       | 0.143                                                                | 0.143                                                                 | 0.143                                                    | 0.143                                                                | 0.143                                                                 | 0.143                                                    |
| Map sharpening factor                               | -78.4                                                                | -61                                                                   | -75                                                      | -94.3                                                                | -84.7                                                                 | -64.1                                                    |
| <b>Model refinement</b>                             |                                                                      |                                                                       |                                                          |                                                                      |                                                                       |                                                          |
| Initial PDB model used                              | 6VYB, 6W41, 1GIG                                                     | 6W41, 1GIG                                                            |                                                          | 6VXX, 6DG2, 1K4C                                                     | 6VXX, 6DG2, 1K4C                                                      |                                                          |
| Model resolution (Å)                                | 3.4                                                                  | 3.7                                                                   |                                                          | 3.3                                                                  | 3.6                                                                   |                                                          |
| FSC threshold                                       | 0.5                                                                  | 0.5                                                                   |                                                          | 0.5                                                                  | 0.5                                                                   |                                                          |
| Model composition                                   |                                                                      |                                                                       |                                                          |                                                                      |                                                                       |                                                          |
| Non-hydrogen atoms                                  | 27,022                                                               | 3,295                                                                 |                                                          | 29,766                                                               | 3202                                                                  |                                                          |
| Protein residues                                    | 3,391                                                                | 423                                                                   |                                                          | 3627                                                                 | 402                                                                   |                                                          |
| Ligand residues                                     | 105                                                                  | 1                                                                     |                                                          | 111                                                                  | 4                                                                     |                                                          |
| B-factors (Å <sup>2</sup> )                         |                                                                      |                                                                       |                                                          |                                                                      |                                                                       |                                                          |
| protein residues                                    | 115                                                                  | 93                                                                    |                                                          | 100                                                                  | 82                                                                    |                                                          |
| ligands (glycans)                                   | 118                                                                  | 99                                                                    |                                                          | 140                                                                  | 76                                                                    |                                                          |
| RMS deviations                                      |                                                                      |                                                                       |                                                          |                                                                      |                                                                       |                                                          |
| Bond lengths (Å)                                    | 0.006                                                                | 0.005                                                                 |                                                          | 0.004                                                                | 0.006                                                                 |                                                          |
| Bond angles (°)                                     | 0.724                                                                | 0.710                                                                 |                                                          | 0.737                                                                | 0.927                                                                 |                                                          |
| Validation                                          |                                                                      |                                                                       |                                                          |                                                                      |                                                                       |                                                          |
| Molprobrity score                                   | 1.82                                                                 | 1.83                                                                  |                                                          | 1.73                                                                 | 1.82                                                                  |                                                          |
| Clashscore                                          | 10.02                                                                | 11.92                                                                 |                                                          | 8.76                                                                 | 11.03                                                                 |                                                          |
| Poor rotamers (%)                                   | 0.18                                                                 | 0.00                                                                  |                                                          | 0.57                                                                 | 0.00                                                                  |                                                          |
| Ramachandran                                        |                                                                      |                                                                       |                                                          |                                                                      |                                                                       |                                                          |
| Favored (%)                                         | 95.70                                                                | 96.40                                                                 |                                                          | 96.18                                                                | 96.19                                                                 |                                                          |
| Allowed (%)                                         | 4.30                                                                 | 3.60                                                                  |                                                          | 3.82                                                                 | 3.81                                                                  |                                                          |
| Outliers (%)                                        | 0.00                                                                 | 0.00                                                                  |                                                          | 0.00                                                                 | 0.00                                                                  |                                                          |

# Table S2. GISAID citations. Related to Figure 4.

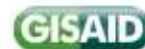

We gratefully acknowledge the following Authors from the Originating laboratories responsible for obtaining the specimens, as well as the Submitting laboratories where the genome data were generated and shared via GISAID, on which this research is based.

All Submitters of data may be contacted directly via [www.gisaid.org](http://www.gisaid.org)

| Accession ID                                                                                                                                   | Originating Laboratory                                                                           | Submitting Laboratory                                                                                                                                                   | Authors                                                                                                                                                                                                                                                                                                                                                                                                                                                                                                                                                            |
|------------------------------------------------------------------------------------------------------------------------------------------------|--------------------------------------------------------------------------------------------------|-------------------------------------------------------------------------------------------------------------------------------------------------------------------------|--------------------------------------------------------------------------------------------------------------------------------------------------------------------------------------------------------------------------------------------------------------------------------------------------------------------------------------------------------------------------------------------------------------------------------------------------------------------------------------------------------------------------------------------------------------------|
| EPI_ISL_430518                                                                                                                                 | Victorian Infectious Diseases Reference Laboratory (VIDRL)                                       | Microbiological Diagnostic Unit Public Health Laboratory and Victorian Infectious Diseases Reference Laboratory. The Peter Doherty Institute for Infection and Immunity | Caly L., Seeman T., Salt, M., Schultz M., Druce J., Sherry, N.                                                                                                                                                                                                                                                                                                                                                                                                                                                                                                     |
| EPI_ISL_444976                                                                                                                                 | Hospital Universitario Vall d'Hebron - Vall d'Hebron Institut de Recerca                         | Hospital Universitario Vall d'Hebron                                                                                                                                    | Cristina Andrés, Maria Pifana, Damir Garcia-Cefic, Mercedes Guerrero-Murillo, Ariadna Randó, Juliana Esperalba, Maria Gemá Codina, Tomás Pumarós, Josep Quer, Andrés Antón                                                                                                                                                                                                                                                                                                                                                                                         |
| EPI_ISL_447308                                                                                                                                 | Servicio de Microbiología, Hospital Clínico Universitario de Valencia                            | Sequencing and Bioinformatics Service and Molecular Epidemiology Research Group, FISABID-Public Health                                                                  | Mariana Reyes-Prieto, Vicente Soriano Chirona, Ivan Anwar, Lúcia Martínez-Priego, Giuseppe Auna, David Navarro, Elisa Albert, Maria Alma Bracho, Lidia Ruiz-Roldán, Neria Garcia-Gonzalez, Inma Galán Vendrell, Sandra Carlos, Loreto Ferris Abad, Paula Ruiz-Hueso, Fernando Gonzalez-Candela                                                                                                                                                                                                                                                                     |
| EPI_ISL_448386                                                                                                                                 | Quadram Institute Bioscience                                                                     | COVID-19 Genomics UK (COG-UK) Consortium                                                                                                                                | Dave J. Baker, Gemma L. Kay, Alp Aydin, Thanh Le-Viet, Steven Rüdiger, Ana F. Tedin, Anastasia Kolyva, Maria Diaz, Leonards de Oliveira Martins, Nabil Faraed Alkhan, Lizlie Meadows, Rachael Stanley, Rigazi Elmog, Muhammed Yasin, Nicholas M. Thomson, Alexander J. Trotter, Rachel Girois, Samuel Bloomfield, Claire Stuart, Andrew Bell, Reemeh Prakash, Samir Dervisevic, Alison E. Mather, John Wain, Mark Webber, Andrew J. Page, Justin O'Grady                                                                                                           |
| EPI_ISL_454530                                                                                                                                 | NH Influenza                                                                                     | NH Influenza                                                                                                                                                            | Podder V                                                                                                                                                                                                                                                                                                                                                                                                                                                                                                                                                           |
| EPI_ISL_455588                                                                                                                                 | Tiang Hospital                                                                                   | National Institute of Health, Department of medical Sciences, Ministry of Public Health, Thailand                                                                       | Phaiuk Okada, Sriporn Phuyupum, Thanutapa, Thanadachakul, Sittiporn, Parinwan, Worawan, Wongboot, Surthareeya Waicharoen, Nalmee, Chittaganipith                                                                                                                                                                                                                                                                                                                                                                                                                   |
| EPI_ISL_460935                                                                                                                                 | Dutch COVID-19 response team                                                                     | Erasmus Medical Center                                                                                                                                                  | Bas Oude Munnink, David Nieuwenhuijse, Reina Sikkema, Claudia Schapendonk, Irina Chestakova, Anne van der Linden, Theo Bestebroer, Stefan van Nieuwkoop, Mark Fronk, Pascal Leemans, Corien Swaan, Marion Haverkate, Madelief Molers, Mart Stein, Sandra Kengne Kampa Mbou, Jeroen van Kampen, Jolanda Voermans, Ajma Timen, Corine GeurtsvanKessel, Anneriek van der Eijk, Richard Molenkamp, Marlon Koopmans, on behalf of the Dutch national COVID-19 response team                                                                                             |
| EPI_ISL_461895                                                                                                                                 | Queens Medical Centre, Clinical Microbiology Department / DeepSeq Nottingham                     | COVID-19 Genomics UK (COG-UK) Consortium                                                                                                                                | Gemma Clark, Wendy Smith, Manjinder Khakh, Hannah Howson-Wells, Jonathan Ball, Patrick McClure, Joseph Chappell, Theocharis Tsionidis, Nadine Holmes, Matthew Carlisle, Christopher Moore, Fel Sang, Johnny Debebe, Victoria Wright, Matthew Loose                                                                                                                                                                                                                                                                                                                 |
| EPI_ISL_463539                                                                                                                                 | Washington State Department of Health                                                            | Seattle Flu Study                                                                                                                                                       | Chu et al                                                                                                                                                                                                                                                                                                                                                                                                                                                                                                                                                          |
| EPI_ISL_464376, EPI_ISL_465520                                                                                                                 | Respiratory Virus Unit, Microbiology Services Colindale, Public Health England                   | Respiratory Virus Unit, Microbiology Services Colindale, Public Health England                                                                                          | PHE Covid Sequencing Team                                                                                                                                                                                                                                                                                                                                                                                                                                                                                                                                          |
| EPI_ISL_466906                                                                                                                                 | Max von Pettenkofer Institute, Virology, National Reference Center for Retroviruses, LMU München | Laboratory for Functional Genome Analysis, Dept. Genomics, Gene Center of the LMU Munich                                                                                | Max Muenchhoff, Stefan Krebs, Alexander Graf, Oliver Kappler, Helmut Blum                                                                                                                                                                                                                                                                                                                                                                                                                                                                                          |
| EPI_ISL_467320                                                                                                                                 | Hospital Clínico Universitario de Santiago de Compostela                                         | SeqCOVID-SPAIN consortium (IBMCSC)                                                                                                                                      | José Javier Costa Alcalde, Antonio Aguilera Guirao, Mª Luisa Pérez del Molino Bernal, Amparo Coira Nieto, Gemá Barbetto Castiñeiras, Rocío Trastoy Pena and SeqCOVID-SPAIN consortium                                                                                                                                                                                                                                                                                                                                                                              |
| EPI_ISL_468369                                                                                                                                 | PHE South West Regional Laboratory, National Infection Service                                   | Wellcome Sanger Institute for the COVID-19 Genomics UK Consortium                                                                                                       | Stephanie Hutchings, Hannah Pymont, Dr Peter Muir, Barry Vipond, Rich Hopes, and Alex Alderton, Roberto Amato, Sonia Goncalves, Ewan Harrison, David K. Jackson, Ian Johnston, Dominic Kwiatkowski, Cordelia Langford, John Silbico on behalf of the Wellcome Sanger Institute COVID-19 Surveillance Team ( <a href="http://www.sanger.ac.uk/covid-team">http://www.sanger.ac.uk/covid-team</a> )                                                                                                                                                                  |
| EPI_ISL_470242                                                                                                                                 | Department of Pathology, University of Cambridge                                                 | Wellcome Sanger Institute for the COVID-19 Genomics UK Consortium                                                                                                       | Luke W Meredith, M. Eszter Tórk, Myra Hosmito, William L. Hamilton, Martin D. Curran, Theresa Felbauer, Grant Hall, Anna Yakovleva, Fahad A Khokhar, Charlotte J. Houldcroft, Laura G Caller, Amro S. Jahouh, Sarah L. Caddy, Ian Goodfellow, and Alex Alderton, Roberto Amato, Sonia Goncalves, Ewan Harrison, David K. Jackson, Ian Johnston, Dominic Kwiatkowski, Cordelia Langford, John Silbico on behalf of the Wellcome Sanger Institute COVID-19 Surveillance Team ( <a href="http://www.sanger.ac.uk/covid-team">http://www.sanger.ac.uk/covid-team</a> ) |
| EPI_ISL_471833                                                                                                                                 | Michigan Department of Health and Human Services, Bureau of Laboratories                         | Michigan Department of Health and Human Services, Bureau of Laboratories                                                                                                | Blankenship HN, Riner D, Soesthen MK                                                                                                                                                                                                                                                                                                                                                                                                                                                                                                                               |
| EPI_ISL_472405                                                                                                                                 | Queens Medical Centre, Clinical Microbiology Department / DeepSeq Nottingham                     | COVID-19 Genomics UK (COG-UK) Consortium                                                                                                                                | Gemma Clark, Wendy Smith, Manjinder Khakh, Vicki M Fleming, Michelle M Lister, Hannah Howson-Wells, Jonathan Ball, Patrick McClure, Joseph Chappell, Theocharis Tsionidis, Nadine Holmes, Matthew Carlisle, Christopher Moore, Fel Sang, Johnny Debebe, Victoria Wright, Matthew Loose                                                                                                                                                                                                                                                                             |
| EPI_ISL_472844, EPI_ISL_473042, EPI_ISL_473071                                                                                                 | Wales Specialist Virology Centre Sequencing Lab: Pathogen Genomics Unit                          | COVID-19 Genomics UK (COG-UK) Consortium                                                                                                                                | Catherine Moore, Johnathan Evans, Laura Gifford, Malorie Perry, Simon Cottrell, Angela Marchbank, Alec Birchley, Alexander Adams, Amy Gaskin, Bree Gatsis-Wilcox, Jason Coombes, Joel Southgate, Lauren Gilbert, Lee Graham, Nicole Pacchiarri, Sara Kumazane-Summerhayes, Sarah Taylor, Sophie Jones, Sara Ray, Matthew Bull, Joanne Watkins, Sally Corden, Tom Connor                                                                                                                                                                                            |
| EPI_ISL_476126                                                                                                                                 | Surtrunns VC                                                                                     | The Public Health Agency of Sweden                                                                                                                                      | Oskar Karlsson Lindqvist, Maria Lind Karberg, Mattias Haukland, Reza Advani, Olov Svartstrom, Anna-Malin Lindé, Sandra Brodsson, Petra Edqvist, Mia Brytting, Anna Roberg, Karin Tegmark-Wisell                                                                                                                                                                                                                                                                                                                                                                    |
| EPI_ISL_479447                                                                                                                                 | Wales Specialist Virology Centre Sequencing Lab: Pathogen Genomics Unit                          | COVID-19 Genomics UK (COG-UK) Consortium                                                                                                                                | Catherine Moore, Johnathan Evans, Laura Gifford, Malorie Perry, Simon Cottrell, Angela Marchbank, Alec Birchley, Alexander Adams, Amy Gaskin, Bree Gatsis-Wilcox, Jason Coombes, Joel Southgate, Lauren Gilbert, Lee Graham, Nicole Pacchiarri, Sara Kumazane-Summerhayes, Sarah Taylor, Sophie Jones, Sara Ray, Matthew Bull, Joanne Watkins, Sally Corden, Tom Connor                                                                                                                                                                                            |
| EPI_ISL_480361                                                                                                                                 | University of Wisconsin-Madison AIDS Vaccine Research Laboratories                               | University of Wisconsin-Madison AIDS Vaccine Research Laboratories                                                                                                      | Gage Moreno, Katarina Braun, et al. AIDS Vaccine Research Laboratories                                                                                                                                                                                                                                                                                                                                                                                                                                                                                             |
| EPI_ISL_480948                                                                                                                                 | Florida Bureau of Public Health Laboratories                                                     | Florida Bureau of Public Health Laboratories                                                                                                                            | Sarah Schmedes, Jason Blanton                                                                                                                                                                                                                                                                                                                                                                                                                                                                                                                                      |
| EPI_ISL_481886, EPI_ISL_488423                                                                                                                 | PHE South West Regional Laboratory, National Infection Service                                   | Wellcome Sanger Institute for the COVID-19 Genomics UK Consortium                                                                                                       | Stephanie Hutchings, Hannah Pymont, Dr Peter Muir, Barry Vipond, Rich Hopes, and Alex Alderton, Roberto Amato, Sonia Goncalves, Ewan Harrison, David K. Jackson, Ian Johnston, Dominic Kwiatkowski, Cordelia Langford, John Silbico on behalf of the Wellcome Sanger Institute COVID-19 Surveillance Team ( <a href="http://www.sanger.ac.uk/covid-team">http://www.sanger.ac.uk/covid-team</a> )                                                                                                                                                                  |
| EPI_ISL_494170, EPI_ISL_494194, EPI_ISL_494240, EPI_ISL_494256, EPI_ISL_494279, EPI_ISL_494311, EPI_ISL_494335, EPI_ISL_494348, EPI_ISL_494352 | Originating lab: Wales Specialist Virology Centre Sequencing Lab: Pathogen Genomics Unit         | COVID-19 Genomics UK (COG-UK) Consortium                                                                                                                                | Catherine Moore, Johnathan Evans, Laura Gifford, Malorie Perry, Simon Cottrell, Angela Marchbank, Alec Birchley, Alexander Adams, Amy Gaskin, Bree Gatsis-Wilcox, Jason Coombes, Joel Southgate, Lauren Gilbert, Lee Graham, Nicole Pacchiarri, Sara Kumazane-Summerhayes, Sarah Taylor, Sophie Jones, Sara Ray, Matthew Bull, Joanne Watkins, Sally Corden, Tom Connor                                                                                                                                                                                            |
| EPI_ISL_494618                                                                                                                                 | Scrrips Medical Laboratory                                                                       | Anderson lab at Scripps Research                                                                                                                                        | SEARCH Alliance San Diego with Michael Quigley, Ellen Stefanski, Ian Mchardy                                                                                                                                                                                                                                                                                                                                                                                                                                                                                       |
| EPI_ISL_495014                                                                                                                                 | B.J. Medical College and Civil hospital                                                          | Gujarat Biotechnology Research Centre                                                                                                                                   | Jarvi Rawal, Zama Patel, Monika Gandhi, Pinal Trivedi, Maheshi Pandya, Nidhi Patel, Nitin Savaliya, Raghavendra Kumar, Dinesh Kumar, Zuber Sayyed, Komal Patel, Labdhi Pandya, Alzai Anwar, Nikha Trivedi, Pranay Shah, Kamlesh J Upadhyay, Sanjay Kapadia, Apurvashri Puvir, R D Dixit, A M Kadi, Harsh Baskhi, Chaitanya Joshi, Madhi Joshi                                                                                                                                                                                                                      |
| EPI_ISL_495015                                                                                                                                 | B.J. Medical College and Civil hospital                                                          | Gujarat Biotechnology Research Centre                                                                                                                                   | Zama Patel, Monika Gandhi, Pinal Trivedi, Maheshi Pandya, Nidhi Patel, Nitin Savaliya, Raghavendra Kumar, Dinesh Kumar, Zuber Sayyed, Komal Patel, Labdhi Pandya, Alzai Anwar, Nikha Trivedi, Pranay Shah, Kamlesh J Upadhyay, Sanjay Kapadia, Apurvashri Puvir, Jarvi Rawal, R D Dixit, A M Kadi, Harsh Baskhi, Chaitanya Joshi, Madhi Joshi                                                                                                                                                                                                                      |
| EPI_ISL_501014                                                                                                                                 | Regional Virus Laboratory, Belfast Health and Social Care Trust                                  | Wellcome Sanger Institute for the COVID-19 Genomics UK Consortium                                                                                                       | Conall McCaughey, James McKenna, Tanya Curran, Susan Feeley, Alison Watt, Clara Cox, Mairead Connor, Zoltan Molnar, David Simpson, Derek Fairley, and Alex Alderton, Roberto Amato, Sonia Goncalves, Ewan Harrison, David K. Jackson, Ian Johnston, Dominic Kwiatkowski, Cordelia Langford, John Silbico on behalf of the Wellcome Sanger Institute COVID-19 Surveillance Team ( <a href="http://www.sanger.ac.uk/covid-team">http://www.sanger.ac.uk/covid-team</a> )                                                                                             |
| EPI_ISL_509133                                                                                                                                 | OHSU Lab Services Molecular Microbiology Lab                                                     | Oregon SARS-CoV-2 Genome Sequencing Center                                                                                                                              | Brendan L. O'Connell, Ruth V. Nichols, Alec J. Hirsch, Guang Fan, Daniel N. Streiblow, William B. Messer, Andrew C. Adey, Benjamin N. Blumberg, Brian J. O'Roak                                                                                                                                                                                                                                                                                                                                                                                                    |
| EPI_ISL_510307                                                                                                                                 | Hospital San Pedro de Alcántara (Cáceres)                                                        | SeqCOVID-SPAIN consortium (IBMCSC)                                                                                                                                      | Cristina Muñoz Cuevas, Guadalupe Rodríguez Rodríguez and SeqCOVID-SPAIN consortium                                                                                                                                                                                                                                                                                                                                                                                                                                                                                 |
| EPI_ISL_510839                                                                                                                                 | Karolinska Universitetslaboratoriet                                                              | The Public Health Agency of Sweden                                                                                                                                      | Oskar Karlsson Lindqvist, Maria Lind Karberg, Mattias Haukland, Reza Advani, Olov Svartstrom, Anna-Malin Lindé, Sandra Brodsson, Petra Edqvist, Mia Brytting, Anna Roberg, Karin Tegmark-Wisell                                                                                                                                                                                                                                                                                                                                                                    |
| EPI_ISL_512069                                                                                                                                 | Sardar Vallabhbhai Patel Institute of Medical Sciences & Research                                | Gujarat Biotechnology Research Centre                                                                                                                                   | Nikha Trivedi, Pranay Shah, Kamlesh J Upadhyay, Sanjay Kapadia, Apurvashri Puvir, Jarvi Rawal, Zama Patel, Monika Gandhi, Pinal Trivedi, Maheshi Pandya, Nidhi Patel, Nitin Savaliya, Raghavendra Kumar, Dinesh Kumar, Zuber Sayyed, Komal Patel, Labdhi Pandya, Alzai Anwar, R D Dixit, A M Kadi, Harsh Baskhi, Chaitanya Joshi, Madhi Joshi                                                                                                                                                                                                                      |
| EPI_ISL_512239                                                                                                                                 | San Diego County Public Health Laboratory                                                        | Anderson lab at Scripps Research                                                                                                                                        | SEARCH Alliance San Diego with Brett Austin                                                                                                                                                                                                                                                                                                                                                                                                                                                                                                                        |
| EPI_ISL_512381, EPI_ISL_512382, EPI_ISL_514453                                                                                                 | Queens Medical Centre, Clinical Microbiology Department / DeepSeq Nottingham                     | COVID-19 Genomics UK (COG-UK) Consortium                                                                                                                                | Gemma Clark, Wendy Smith, Manjinder Khakh, Vicki M Fleming, Michelle M Lister, Hannah Howson-Wells, Jonathan Ball, Patrick McClure, Joseph Chappell, Theocharis Tsionidis, Nadine Holmes, Matthew Carlisle, Christopher Moore, Fel Sang, Johnny Debebe, Victoria Wright, Matthew Loose                                                                                                                                                                                                                                                                             |
| EPI_ISL_515809                                                                                                                                 | Medical Diagnostics Services (MDS)                                                               | KRISP, KZN Research Innovation and Sequencing Platform                                                                                                                  | Gandhin J, Pillay S, Lesellor R, Chirukangarab, Mdaloose K, York D, Khan S, Tegally H, Wilkinson E, de Oliveira T                                                                                                                                                                                                                                                                                                                                                                                                                                                  |
| EPI_ISL_516595                                                                                                                                 | Wilder AG                                                                                        | Department of Biosystems Science and Engineering, ETH Zürich                                                                                                            | Christian Beisel, Sarah Nadeau, Ivan Topolsky, Pedro Ferreira, Philipp Jablonki, Susana Posada-Céspedes, Tobias Schär, Ina Nissen, Natacha Santacrose, Elydie Burcklen, Christiane Beckmann, Maurice Redonda, Olivier Kobel, Christoph Hoppner, Sophie Seidel, Noémie Santamaría de Souza, Niko Beerenwinkel, Tanja Stadler                                                                                                                                                                                                                                        |
| EPI_ISL_518826                                                                                                                                 | Microbiological Diagnostic Unit - Public Health Laboratory (MDU-PHL)                             | MDU-PHL                                                                                                                                                                 | Seeman T., Schultz M., Salt, M., Sherry, N.                                                                                                                                                                                                                                                                                                                                                                                                                                                                                                                        |
| EPI_ISL_523389, EPI_ISL_523399                                                                                                                 | Dutch COVID-19 response team                                                                     | Erasmus Medical Center                                                                                                                                                  | Bas Oude Munnink, David Nieuwenhuijse, Reina Sikkema, Claudia Schapendonk, Irina Chestakova, Anne van der Linden, Theo Bestebroer, Stefan van Nieuwkoop, Mark Fronk, Pascal Leemans, Corien Swaan, Marion Haverkate, Madelief Molers, Mart Stein, Sandra Kengne Kampa Mbou, Jeroen van Kampen, Jolanda Voermans, Ajma Timen, Corine GeurtsvanKessel, Anneriek van der Eijk, Richard Molenkamp, Marlon Koopmans, on behalf of the Dutch national COVID-19 response team                                                                                             |
| EPI_ISL_524740                                                                                                                                 | GMERS Medical College and Hospital, Gandhinagar                                                  | Gujarat Biotechnology Research Centre                                                                                                                                   | Maheshi Pandya, Nidhi Patel, Nitin Savaliya, Raghavendra Kumar, Dinesh Kumar, Zuber Sayyed, Komal Patel, Labdhi Pandya, Alzai Anwar, Nikha Trivedi, Seema Bhatti, Gaurishankar Shrivastava, Bhawesh Modi, Bhatti Rajani, Apurvashri Puvir, Jarvi Rawal, Zama Patel, Monika Gandhi, Pinal Trivedi, R D Dixit, A M Kadi, Harsh Baskhi, Chaitanya Joshi, Madhi Joshi                                                                                                                                                                                                  |
| EPI_ISL_525925                                                                                                                                 | OHSU Lab Services Molecular Microbiology Lab                                                     | Oregon SARS-CoV-2 Genome Sequencing Center                                                                                                                              | Brendan L. O'Connell, Ruth V. Nichols, Alec J. Hirsch, Guang Fan, Daniel N. Streiblow, William B. Messer, Andrew C. Adey, Benjamin N. Blumberg, Brian J. O'Roak                                                                                                                                                                                                                                                                                                                                                                                                    |
| EPI_ISL_526429                                                                                                                                 | Queens Medical Centre, Clinical Microbiology Department / DeepSeq Nottingham                     | COVID-19 Genomics UK (COG-UK) Consortium                                                                                                                                | Gemma Clark, Wendy Smith, Manjinder Khakh, Vicki M Fleming, Michelle M Lister, Hannah Howson-Wells, Jonathan Ball, Patrick McClure, Joseph Chappell, Theocharis Tsionidis, Nadine Holmes, Matthew Carlisle, Christopher Moore, Fel Sang, Johnny Debebe, Victoria Wright, Matthew Loose                                                                                                                                                                                                                                                                             |
| EPI_ISL_528300                                                                                                                                 | University Hospital Basel, Clinical Virology                                                     | University Hospital Basel, Clinical Bacteriology                                                                                                                        | Maden Stange, Alfredo Mar L, Tim Ruloff, Helena MB Seth-Smith, Michael Schweitzer, Myra Brunner, Karoline Lusingger, Kirstine K. Søgaard, Alexander Gerisch, Sarah Tschudin-Sutter, Simon Fuchs, Julia Bielicki, Hans                                                                                                                                                                                                                                                                                                                                              |

EP\_ISL\_528438

Respiratory Virus Unit, Microbiology Services  
Colindale, Public Health England

Respiratory Virus Unit, Microbiology Services Colindale, Public Health  
England

Pargger, Martin Siegemund, Christian Nickel, Roland Bingisser, Michael Osthoff, Stefano Bassetti, Rika Schneider-Sliwa, Manuel Battegay, Hans Hirsch, Adrian Egli  
PHE Covid Sequencing Team

EP\_ISL\_538134

Servicio de Microbiología y Parasitología  
clínica, UCEIMP, Hospital Universitario Virgen  
del Rocío/IBIS/CSC/US

SeqCOVID-SPAIN consortium/IBV(CSIC)

Guillermo Martín Gutiérrez, Ángel Rodríguez Viladres, Lidia Gálvez Benítez, Verónica González Galán, Javier Aznar Martín and SeqCOVID-SPAIN consortium

EP\_ISL\_566030

Michigan Department of Health and Human  
Services, Bureau of Laboratories

Michigan Department of Health and Human Services, Bureau of  
Laboratories

Blankenship HM, Riner D, Soehnlen MK
